# Supplementary material
Source: publisher site journal article supplement (https://www.dovepress.com/get_supplementary_file.php?f=402278.xlsx)
Supplement: Supplementary file 1 [file get_supplementary_file.php]

## Sheet: Sheet1
Supplementary table 1 The low-frequency (< 2%) pathogens causing bloodstream infection
Organisms	2014	2015	2016	2017	2018	2019	2020	2021	Total
	N	N	N	N	N	N	N	N	N
Achromobacter xylosoxidans	3	3	1	1	2	2	0	0	12
Aeromonas spp.	5	3	1	2	9	4	3	5	32
Agrobacterium radiobacter	2	0	0	0	0	0	0	0	2
Bacillus cereus	0	0	0	1	0	1	1	0	3
Bacteroides fragilis	0	0	0	0	2	0	0	0	2
Chromobacterium violaceum	0	1	1	0	0	0	0	0	2
Citrobacter spp.	1	1	2	0	2	0	1	0	7
Cupriavidus pauculus	0	0	0	1	0	0	0	0	1
Edwardsiella tarda	1	0	0	1	0	0	0	0	2
Elizabetkingia spp.	3	5	1	3	2	0	1	0	15
Erysipelothrix rhusiopathiae	0	0	1	1	0	0	0	0	2
Hafnia alvei	2	0	0	0	0	0	0	0	2
Kocuria spp.	0	0	0	0	1	0	0	1	2
Lactococcus lactis	0	0	0	0	0	0	0	1	1
Leclercia adecarboxylata	0	0	0	0	1	0	0	0	1
Listeria monocytogenes	0	0	0	1	0	0	0	0	1
Morganella morganii	2	0	0	0	0	0	0	0	2
Neisseria meningitidis	1	1	1	0	0	1	0	0	4
Ochrobactrum anthropi	0	0	2	0	0	0	0	0	2
Pandoraea spp.	0	0	0	0	0	0	1	0	1
Pantoea spp.	0	0	0	1	1	0	0	0	2
Pasteurella multocida	0	0	0	0	0	0	0	1	1
Proteus spp.	0	1	2	1	1	3	4	11	23
Providencia rettgeri	0	1	0	0	0	0	0	0	1
Ralstonia pickettii	0	0	1	0	0	0	0	0	1
Rhizobium radiobacter	1	0	0	0	0	0	0	0	1
Roseomonas gilardii	0	0	3	0	0	0	0	0	3
Salmonella spp.	4	8	2	5	0	2	2	2	25
Serratia spp.	0	0	4	1	0	2	1	5	13
Shewanella algae	0	1	0	0	0	0	0	0	1
Shewanella putrefaciens	0	0	0	2	0	0	0	0	2
Sphingomonas paucimobilis	0	1	0	1	0	2	2	2	8
Vibrio spp.	0	1	0	0	0	0	1	0	2
Yersinia kristensenii	0	0	0	0	1	0	0	0	1
Total Gram negative-bacteria	171
Total Gram positive-bacteria	9
Total	180
Abbreviations: N: number of isolates
